# Supplementary material for: 3-NAntC: A Potent Crotoxin B-Derived Peptide against the Triple-Negative MDA-MB-231 Breast Cancer Cell Line
Source: MDPI journal article supplement (doi:10.3390/molecules29071646), 2024-04-06
Supplement: s1 [file s1]

# **3-NAntC: A Potent Crotoxin B-Derived Peptide against the Triple-Negative MDA-MB-231 Breast Cancer Cell Line**

**Supplementary results.**

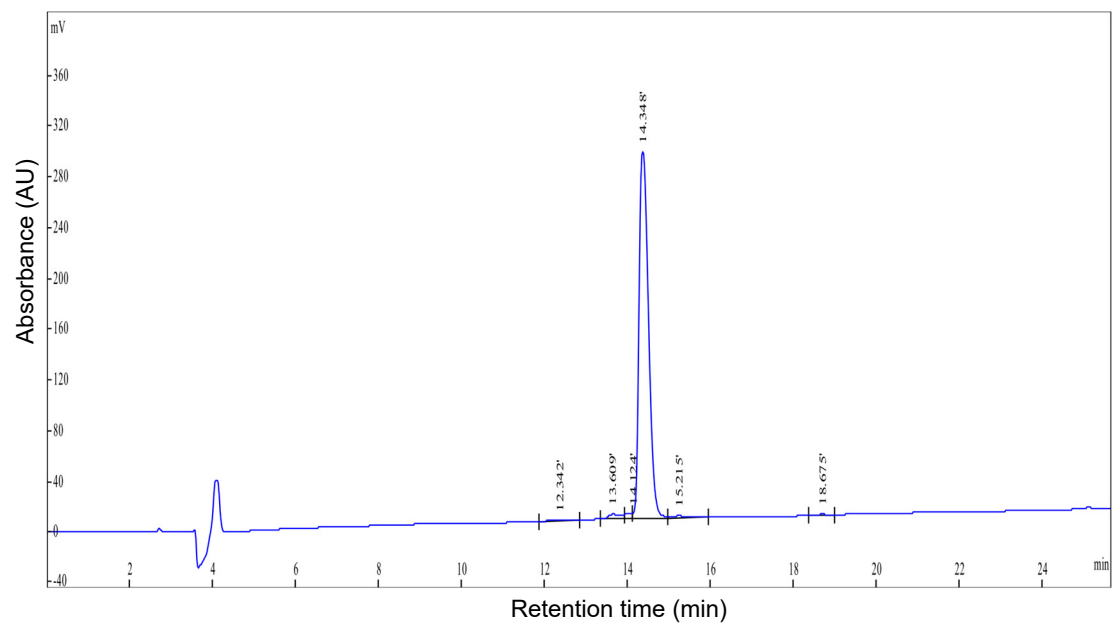

| Peak No. | Ret Time | Height | Area    | Conc.    |
|----------|----------|--------|---------|----------|
| 1        | 12.342   | 1289   | 35239   | 0.7983   |
| 2        | 13.609   | 3409   | 71174   | 1.612    |
| 3        | 14.124   | 4266   | 44560   | 1.009    |
| 4        | 14.348   | 288295 | 4223309 | 95.67    |
| 5        | 15.215   | 1754   | 32466   | 0.7354   |
| 6        | 18.675   | 1101   | 7769    | 0.176    |
| Total    |          |        |         | 100.0000 |

**Supplementary Figure S1. HPLC chromatogram of 3-NantC.** The peptide had a purity higher than 95%. Absorbance at the wavelength of 220 nm.

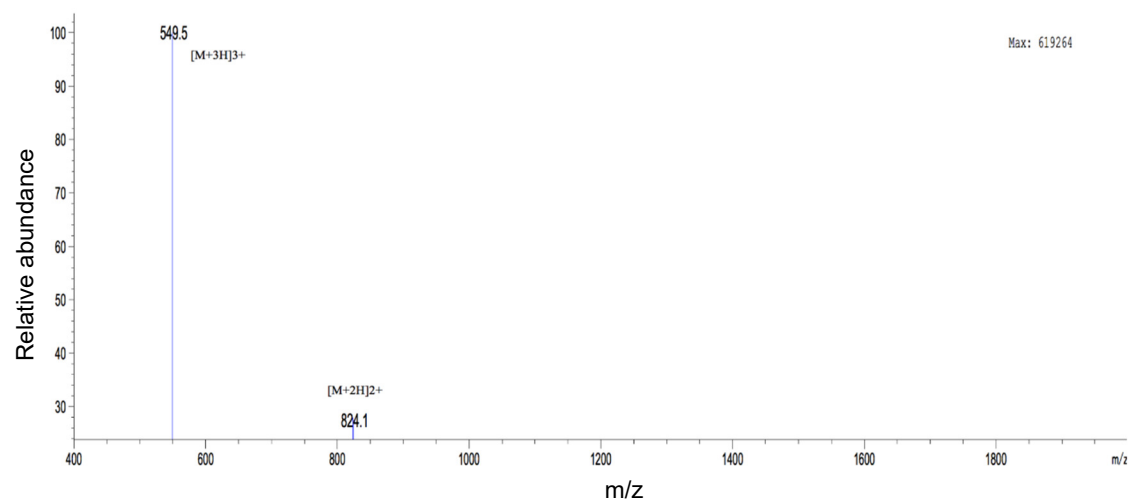

**Supplementary Figure S2. MS spectrum of 3-NantC.** The mass spectrometry characterization with ESI ionization confirmed the peptide sequence [H]-MFYPDSRCRGPSET-[OH] (Molecular weight = 1,645.95 g/mol).

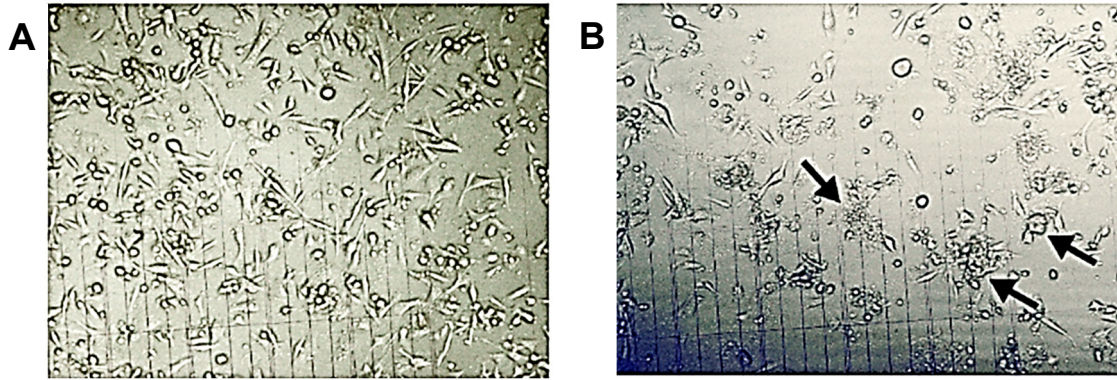

**Supplementary Figure S3. Antitumor effect of the peptide 3-NantC against triple-negative breast cancer.** MDA-MB-231 cells were incubated in presence and absence of 3-NantC (1 µg/mL) for 24 hours. (A) Untreated triple negative tumor cells exhibiting a large number of cells. (B). Tumor cells after being treated with the peptide 3-NantC. The arrows indicate the tumor cells (MDA-MB-231), which are shown in smaller numbers and with vesicles compatible with apoptotic bodies when compared with the untreated tumor cells.

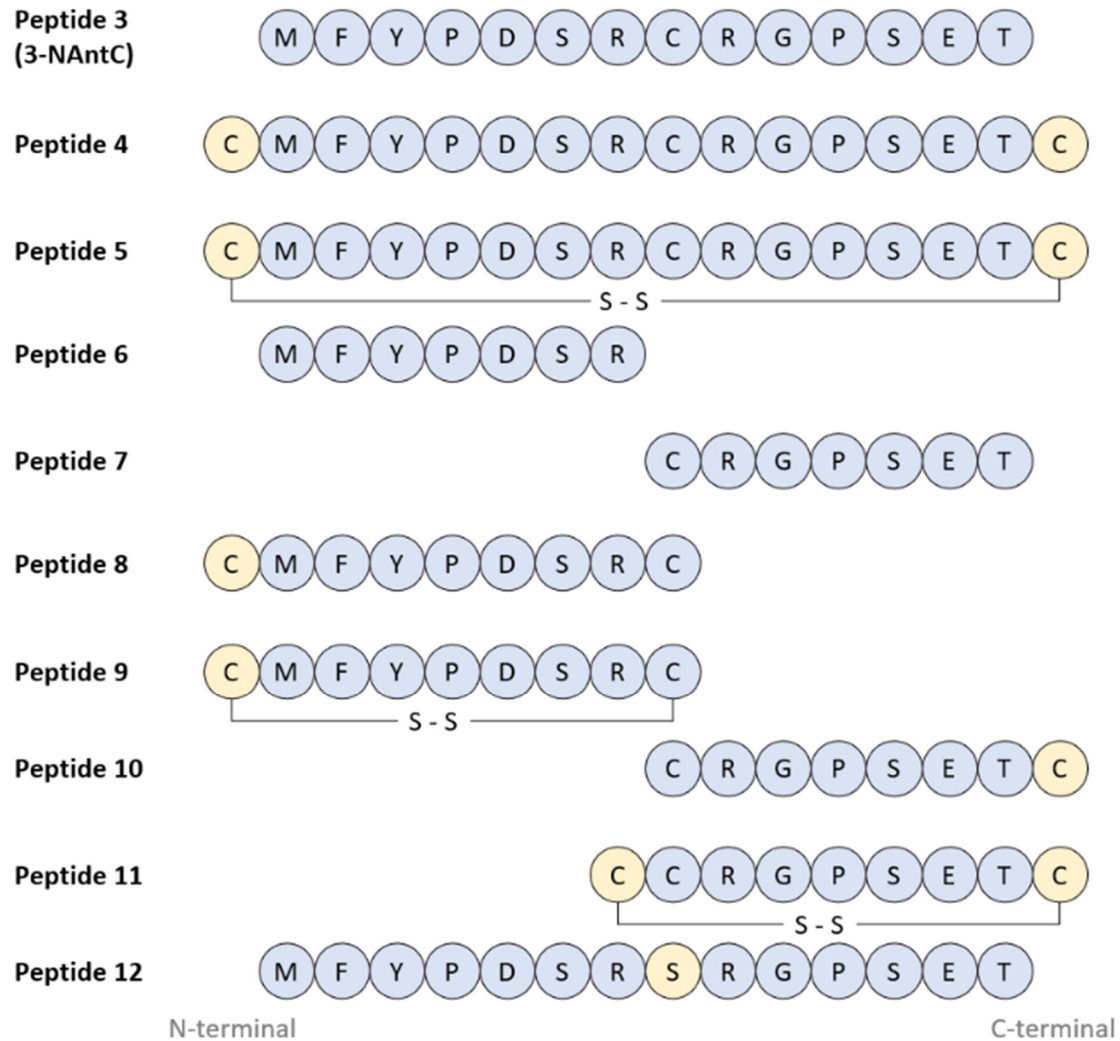

**Supplementary Figure S4. Amino acid sequences of the 3-NAntC-derived peptides.** The amino acids matching the original 3-NAntC sequence are shown in blue, while the additional amino acids are shown in light orange. Intramolecular disulfide bonds are denoted as 'S-S'. The sequences are shown from the N- to the C-terminal regions.

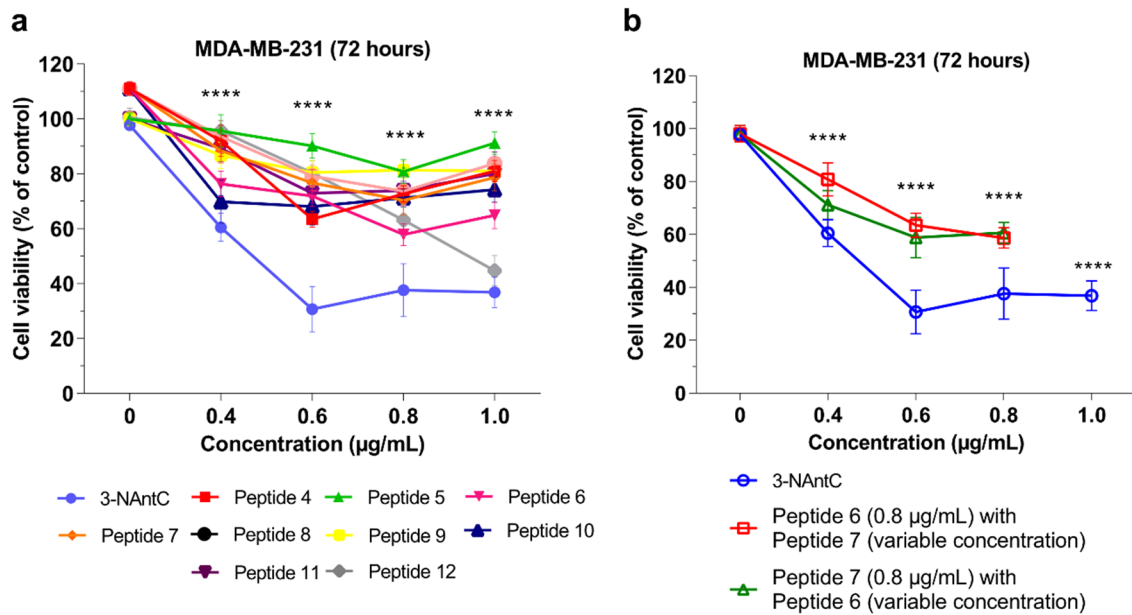

**Supplementary Figure S5. Effect of 3-NAntC-derived peptides on TNBC cells (MDA-MB-231) viability.** (A) MDA-MB-231 cells were treated with 3-NAntC or peptides 4 – 12 for 72 hours at the concentration range of 0.4 – 1.0  $\mu\text{g/mL}$ . (B) Antitumor effect of 3-NAntC in comparison with the combination of the peptides 6 and 7. Cellular viability assay was conducted using the MTT method for the TNBC cell line. Data are shown as mean  $\pm$  SEM of at least three independent assays in triplicate. Treatment groups for each peptide were compared to the respective negative control (PBS 0.02%) using the two-way ANOVA and the Bonferroni post hoc test. \* $p < 0.05$ , \*\* $p < 0.01$ , \*\*\* $p < 0.001$ , and \*\*\*\* $p < 0.0001$  denote statistically significant differences for all the groups at a specific concentration.

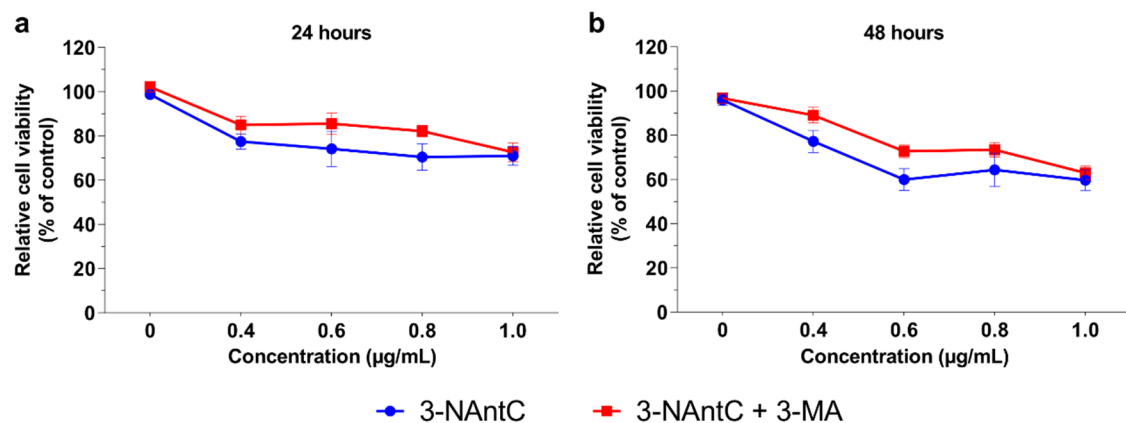

**Supplementary Figure S6. Effect of 3-methyladenine (3-MA) (an autophagy inhibitor) on the decrease of the MDA-MB-231 cell viability mediated by 3-NAntC.** MDA-MB-231 cells were treated with increasing concentrations of 3-NAntC in the presence or not of 3-methyladenine (3-MA) for 24 (A) or 48 hours (B). Cell viability was measured using the MTT assay. Data are shown as mean  $\pm$  SEM of at least three independent assays in triplicate. Groups treated with 3-NAntC alone were compared to those treated with 3-NAntC + 3-MA (the autophagy inhibitor) using the one-way ANOVA and the Bonferroni posthoc test. No statistically significant differences were observed between the groups,  $p > 0.05$ .

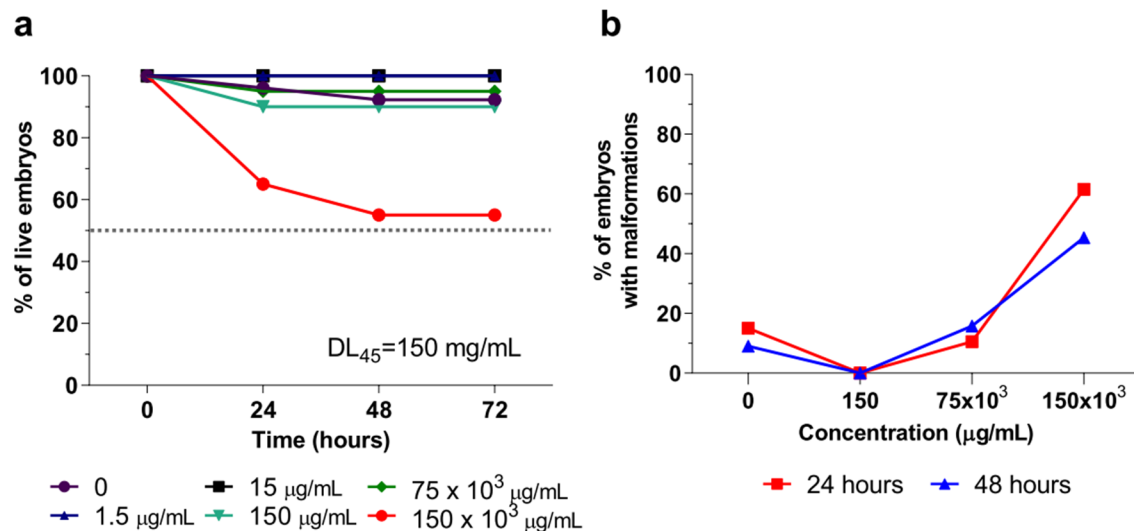

**Supplementary Figure S7. 3-NAntC safety evaluation using zebrafish embryos.**

Embryo survival (A) and malformation in live embryos (B) were assessed following the exposure to 3-NAntC (1.5 – 150  $\times 10^3 \mu\text{g/mL}$ ) for up to 72 hours. 3-NAntC exhibits low toxicity and malformation in zebrafish embryos up to 75  $\text{mg/mL}$ . Data is shown as the percentage of live embryos and percentage of live embryos with malformation after the treatment with 3-NAntC (n=20 embryos/group).

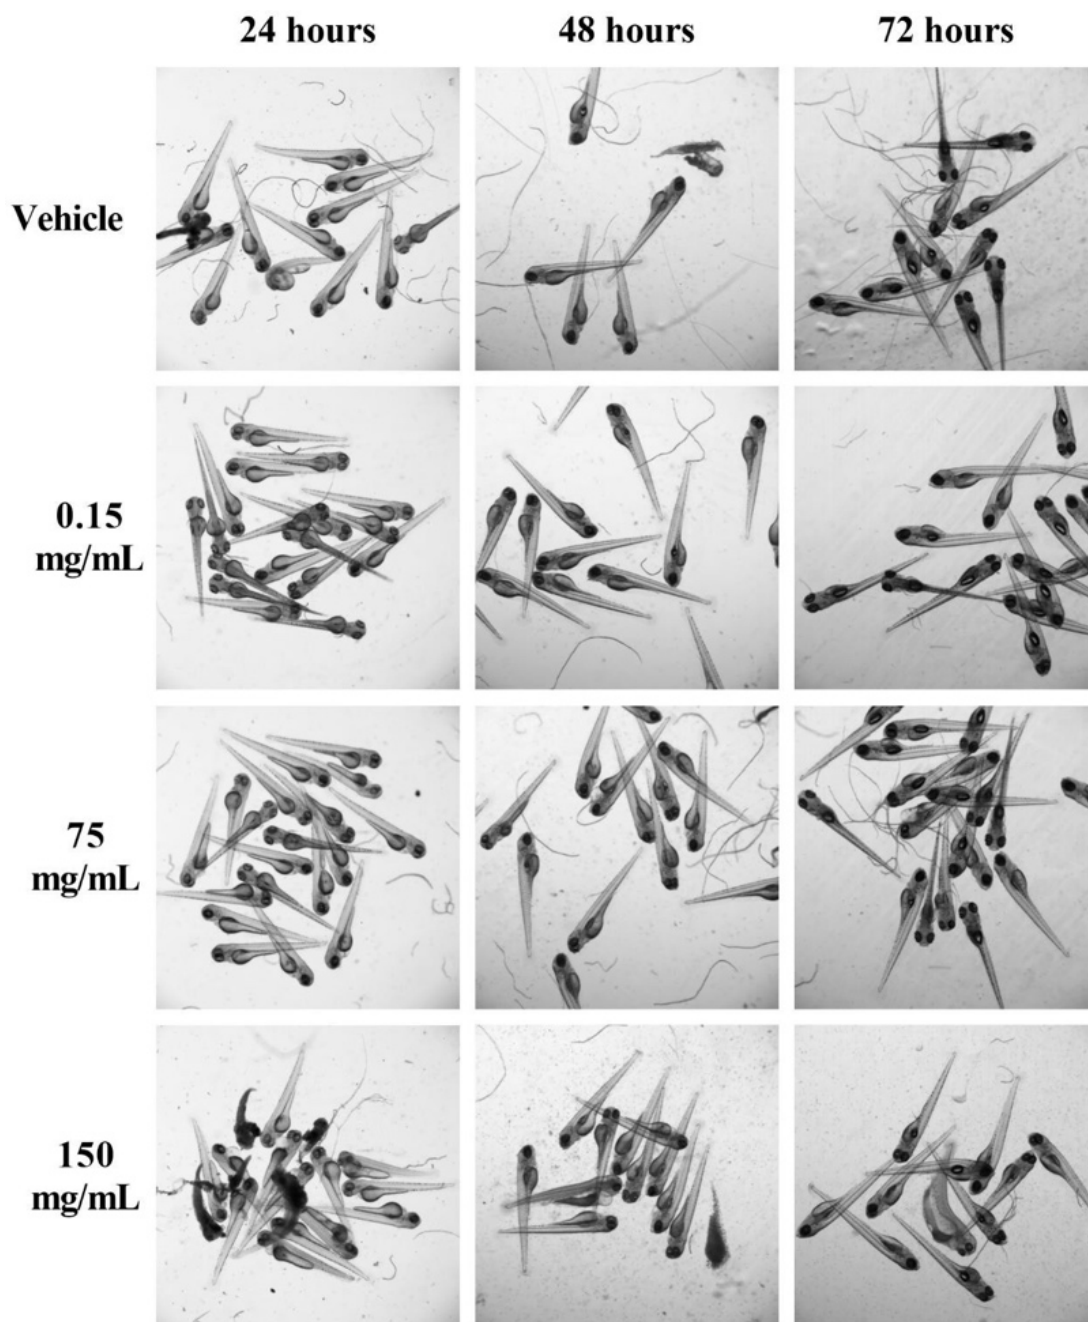

**Supplementary Figure S8. Representative images of the tolerability test of 3-NantC in zebrafish embryos.** Zebrafish embryos were incubated with vehicle (control) or 3-NantC peptide (0.15, 75, and 150 mg/mL) for 24, 48, or 72 hours.

**Supplementary Table S1. Normality score for each data set used in the present study.**

| Data set |     |                      | n  | Shapiro-Wilk |         |
|----------|-----|----------------------|----|--------------|---------|
|          |     |                      |    | score        | p-value |
| Figure 2 | 24h | MCF10A Peptide 1     | 40 | 0.9527       | 0.7543  |
|          |     | MCF10A Peptide 2     | 51 | 0.8985       | 0.3217  |
|          |     | MCF10A Peptide 3     | 46 | 0.9157       | 0.4365  |
|          |     | MDA-MB-231 Peptide 1 | 29 | 0.9402       | 0.0514  |

|          |     |                           |    |        |        |
|----------|-----|---------------------------|----|--------|--------|
|          |     | MDA-MB-231<br>Peptide 2   | 44 | 0.9541 | 0.0785 |
|          |     | MDA-MB-231<br>Peptide 3   | 37 | 0.9579 | 0.1737 |
| Figure 2 | 48h | MCF10A Peptide 1          | 40 | 0.9278 | 0.5324 |
|          |     | MCF10A Peptide 2          | 57 | 0.9838 | 0.8265 |
|          |     | MCF10A Peptide 3          | 51 | 0.9609 | 0.6406 |
|          |     | MDA-MB-231<br>Peptide 1   | 21 | 0.9366 | 0.1865 |
|          |     | MDA-MB-231<br>Peptide 2   | 37 | 0.9589 | 0.1857 |
|          |     | MDA-MB-231<br>Peptide 3   | 39 | 0.9633 | 0.2291 |
| Figure 3 | 24h | MCF10A                    | 23 | 0.9283 | 0.1004 |
|          |     | HMEC                      | 22 | 0.9638 | 0.1892 |
|          |     | HDFa                      | 49 | 0.973  | 0.3173 |
|          |     | MDA-MB-231                | 58 | 0.9727 | 0.2155 |
|          |     | MCF7                      | 28 | 0.9304 | 0.1633 |
| Figure 3 | 48h | MCF10A                    | 26 | 0.8954 | 0.1237 |
|          |     | HMEC                      | 29 | 0.9451 | 0.1363 |
|          |     | HDFa                      | 52 | 0.9566 | 0.5580 |
|          |     | MDA-MB-231                | 57 | 0.9821 | 0.5590 |
|          |     | MCF7                      | 24 | 0.9409 | 0.1705 |
| Figure 3 | 72h | MCF10A                    | 28 | 0.9409 | 0.1164 |
|          |     | HMEC                      | 37 | 0.951  | 0.1243 |
|          |     | HDFa                      | 47 | 0.9619 | 0.1279 |
|          |     | MDA-MB-231                | 64 | 0.9382 | 0.0514 |
|          |     | MCF7                      | 20 | 0.9724 | 0.8051 |
| Figure 4 | 24h | MDA-MB-231<br>3-NAntC     | 60 | 0.9477 | 0.1210 |
|          |     | MDA-MB-231<br>Doxorubicin | 68 | 0.9579 | 0.2192 |
|          |     | MDA-MB-231<br>Cisplatin   | 54 | 0.9635 | 0.2985 |
|          |     | HDFa<br>3-NAntC           | 50 | 0.9739 | 0.3317 |
|          |     | HDFa<br>Doxorubicin       | 35 | 0.9243 | 0.1903 |
|          |     | HDFa<br>Cisplatin         | 35 | 0.9532 | 0.2146 |
| Figure 4 | 48h | MDA-MB-231<br>3-NAntC     | 52 | 0.9607 | 0.3843 |
|          |     | MDA-MB-231<br>Doxorubicin | 66 | 0.9035 | 0.0858 |
|          |     | MDA-MB-231<br>Cisplatin   | 54 | 0.9795 | 0.4784 |
|          |     | HDFa<br>3-NAntC           | 54 | 0.9515 | 0.3790 |
|          |     | HDFa<br>Doxorubicin       | 32 | 0.9286 | 0.3588 |



|          |     |                           |    |        |         |
|----------|-----|---------------------------|----|--------|---------|
|          |     | HDFa<br>Cisplatin         | 21 | 0.8565 | 0.05515 |
| Figure 4 | 72h | MDA-MB-231<br>3-NAntC     | 83 | 0.8868 | 0.2450  |
|          |     | MDA-MB-231<br>Doxorubicin | 69 | 0.8537 | 0.2010  |
|          |     | MDA-MB-231<br>Cisplatin   | 51 | 0.9732 | 0.3997  |
|          |     | HDFa<br>3-NAntC           | 53 | 0.9668 | 0.3470  |
|          |     | HDFa<br>Doxorubicin       | 30 | 0.8243 | 0.1877  |
|          |     | HDFa<br>Cisplatin         | 29 | 0.9127 | 0.3003  |
| Figure 5 | 24h | MDA-MB-231                | 74 | 0.9587 | 0.3165  |
|          | 48h | MDA-MB-231                | 74 | 0.9306 | 0.1608  |
|          |     | MDA-MB-231<br>G0/G1       | 19 | 0.8936 | 0.0574  |
|          |     | MDA-MB-231<br>S           | 23 | 0.9378 | 0.1649  |
|          |     | MDA-MB-231<br>G2/M        | 21 | 0.9696 | 0.4241  |
|          | 72h | MDA-MB-231                | 67 | 0.9201 | 0.0585  |
|          |     | HDFa                      | 35 | 0.9699 | 0.4405  |
| Figure 6 | 24h | MDA-MB-231<br>Apoptosis   | 14 | 0.9511 | 0.5773  |
|          |     | MDA-MB-231<br>Necrosis    | 18 | 0.8226 | 0.0583  |
|          |     | MDA-MB-231<br>LDH         | 13 | 0.9251 | 0.2938  |
|          | 48h | MDA-MB-231<br>Apoptosis   | 16 | 0.7916 | 0.2309  |
|          |     | MDA-MB-231<br>Necrosis    | 12 | 0.9499 | 0.6362  |
|          |     | MDA-MB-231<br>LDH         | 16 | 0.7745 | 0.2127  |
|          | 72h | MDA-MB-231<br>Apoptosis   | 77 | 0.9294 | 0.3584  |
|          |     | MDA-MB-231<br>Necrosis    | 85 | 0.951  | 0.4746  |
|          |     | MDA-MB-231<br>LDH         | 72 | 0.9703 | 0.5867  |
